# Supplementary material for: Design, Synthesis, and Preliminary Evaluation of [68Ga]Ga-NOTA-Insulin as a PET Probe in an Alzheimer’s Disease Mouse Model
Source: PubMed Central journal article supplement — Bioconjug Chem. 2022 Apr 14;33(5):892–906. doi: 10.1021/acs.bioconjchem.2c00126 (PMC9121347; doi:10.1021/acs.bioconjchem.2c00126), 2022-04-14
Supplement: bc2c00126_si_001.pdf [file bc2c00126_si_001.pdf]

## **Supporting Information For**

# **Design, Synthesis, and Preliminary Evaluation of [<sup>68</sup>Ga]Ga-NOTA-Insulin as a PET Probe in Alzheimer's Disease Mouse Model**

Jillissa C. Taubel<sup>✉,1</sup>, Nicholas R. Nelson<sup>✉,1</sup>, Aditya Bansal<sup>1</sup>, Geoffrey L. Curran<sup>1</sup>, Lushan Wang<sup>2</sup>, Zengtao Wang<sup>2</sup>, Heather M. Berg<sup>1</sup>, Cynthia J. Vernon<sup>1</sup>, Hoon-Ki Min<sup>1</sup>, Nicholas B. Larson<sup>3</sup>, Timothy R. DeGrado<sup>4</sup>, Karunya Kandimalla<sup>\*2</sup>, Val J. Lowe<sup>1\*</sup>, Mukesh K. Pandey<sup>1\*</sup>

<sup>1</sup>Division of Nuclear Medicine, Department of Radiology, Mayo Clinic Rochester, MN 55905, United States

<sup>2</sup>Department of Pharmaceutics, College of Pharmacy, University of Minnesota, Minneapolis, MN 55455, United States

<sup>3</sup>Department of Quantitative Health Sciences, Mayo Clinic, Rochester, MN 55905, United States

<sup>4</sup>Department of Radiology, University of Colorado Anschutz Medical Campus, Aurora, CO 80045, United States

### **Description of Supporting Figures:**

**Figure S1:** HPLC traces of different product during optimization of NOTA-insulin reaction time

**Figure S2:** Representative HPLC trace of different products after reaction optimization and PD-10 purification (one of the fractions)

**Figure S3:** Representative HPLC trace of one of the PD-10 purified fractions used for radiolabeling

**Figure S4:** r-TLC trace of [<sup>68</sup>Ga]Ga-NOTA-insulin

**Figure S5:** MALDI-TOF spectrum of insulin

**Figure S6:** MALDI-TOF spectrum of NOTA-insulin before reaction condition optimization and after PD-10 purification

**Figure S7:** Uptake (SUV) of [<sup>11</sup>C]PIB in Normal (B6SJL) and AD (APP/PS1) mice models at 30 min post intravenous administration measured via organ/tissue harvesting. P values have been adjusted for multiple testing

**Figure S8:** Brain (SUV) of (A) [ $^{18}\text{F}$ ]AV1451 and (B) [ $^{11}\text{C}$ ]PIB and Heart (SUV) (C) [ $^{18}\text{F}$ ]AV1451 and (D) [ $^{11}\text{C}$ ]PIB in AD (n=4 for each tracer) and normal (n=4 for each tracer) mice at 5, 10, 15 and 20 min post intravenous (i.v.) administration. The uptake (SUV) data for figure S8 was extracted from micro-PET/CT images by drawing region of interest (ROI) at different timepoints.

**Figure S9:** Uptake (SUV) and biodistribution of (A) [ $^{18}\text{F}$ ]AV1451 and (B) [ $^{11}\text{C}$ ]PIB in in different brain regions of AD (n=4 for each tracer) and normal (n=4 for each tracer) at 30 min post intravenous (i.v.) administration.

**Figure S10:** Uptake (SUV) and biodistribution of (A) [ $^{18}\text{F}$ ]AV1451 and (B) [ $^{11}\text{C}$ ]PIB in AD (n=4 for each tracer) and normal (n=4 for each tracer) at 30 min post intravenous (i.v.) administration.

**Figure S11:** Representative micro-PET/CT images of (A) [ $^{18}\text{F}$ ]AV1451 and (B) [ $^{11}\text{C}$ ]PIB in normal and AD mice at different time points post intravenous (i.v.) administration.

### **Description of Supporting Tables:**

**Table S1:** Details of injected NOTA-insulin (nonradioactive mass) as [ $^{68}\text{Ga}$ ]Ga-NOTA-insulin, specific activity( $A_s$ ) at time of injection and molar activity( $A_m$ ) at end of the synthesis

**Table S2:** Uptake (SUV) of [ $^{18}\text{F}$ ]AV1451 in brain of AD (APP/PS1) and normal (B6SJL) mice post intravenous administration measured via micro PET/CT image analysis and drawing region of interest (ROI) on whole mice brain and whole heart at different timepoints.

**Table S3:** Uptake (SUV) of [ $^{18}\text{F}$ ]AV1451 in different brain regions of B6SJL (normal) and APP/PS1 (AD) mice models at 30 min post intravenous administration measured via organ/tissue harvesting

**Table S4:** Uptake (SUV) of [ $^{18}\text{F}$ ]AV1451 in Normal (B6SJL) and AD (APP/PS1)mice models at 30 min post intravenous administration measured via organ/tissue harvesting.

**Table S5:** Uptake (SUV) of [ $^{11}\text{C}$ ]PIB in brain of AD (APP/PS1) and normal (B6SJL) mice post intravenous administration measured via micro PET/CT image analysis and drawing region of interest (ROI) on whole mice brain and whole heart at different timepoints.

**Table S6:** Uptake (SUV) of [ $^{11}\text{C}$ ]PIB in different brain regions of Normal (B6SJL) and AD (APP/PS1) mice models at 30 min post intravenous administration measured via organ/tissue harvesting. P values have been adjusted for multiple testing.

**Table S7:** Uptake (SUV) of [ $^{11}\text{C}$ ]PIB in normal (B6SJL) and AD (APP/PS1) mice models at 30 min post intravenous administration measured via organ/tissue harvesting. P values have been adjusted for multiple testing.

**Figure S1:** HPLC traces of different product during optimization of NOTA-insulin reaction time

**HPLC trace of reaction mixture at different time points during optimization of NOTA-insulin synthesis (without PD-10 purification)**

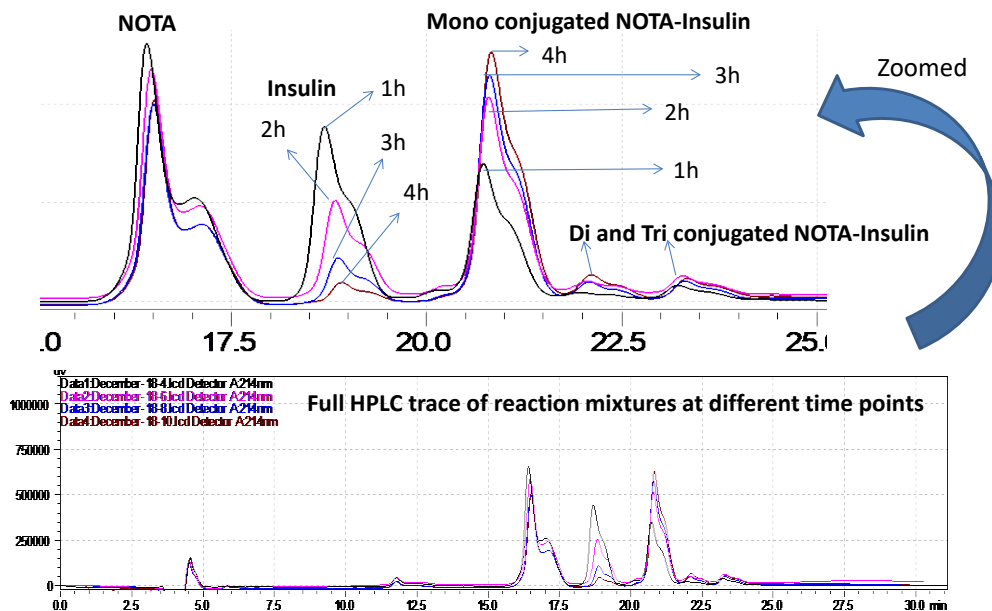

**Figure S2:** Representative HPLC trace of different products after reaction optimization and PD-10 purification (one of the fractions)

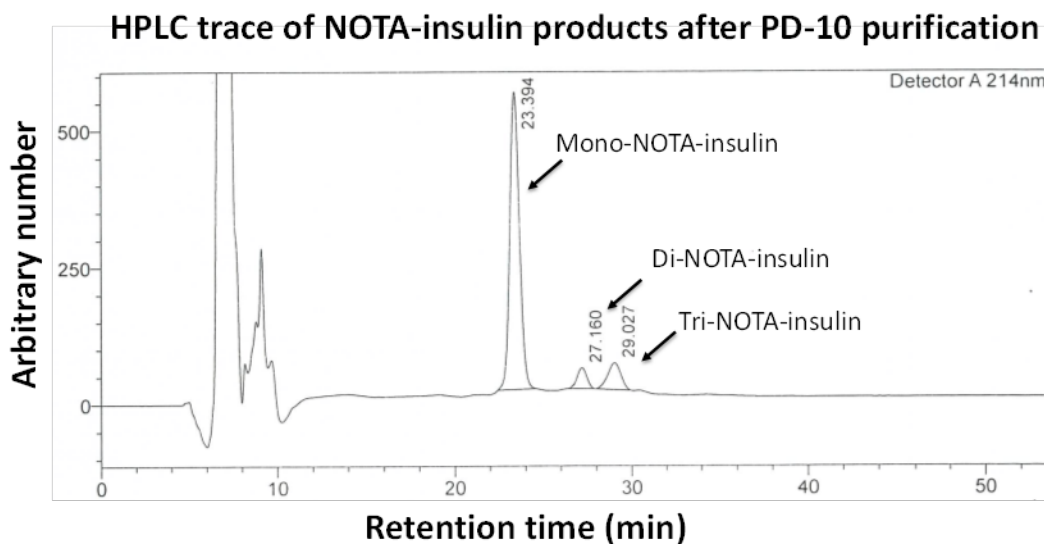

**Note:** Relative retention time may shift ( $\pm 1.5$  min) from day-to-day HPLC analysis and after PD-10 purification.

**Figure S3:** Representative HPLC trace of one of the PD-10 purified fractions used for radiolabeling

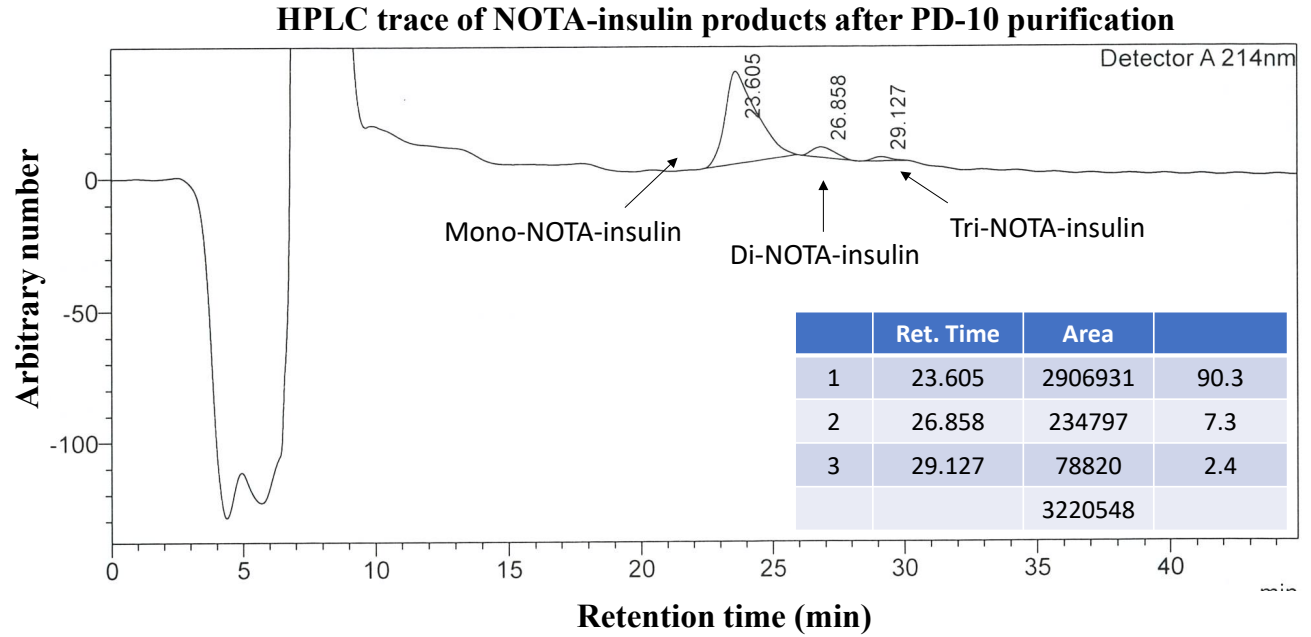

**Figure S4:** MALDI-TOF spectrum of insulin

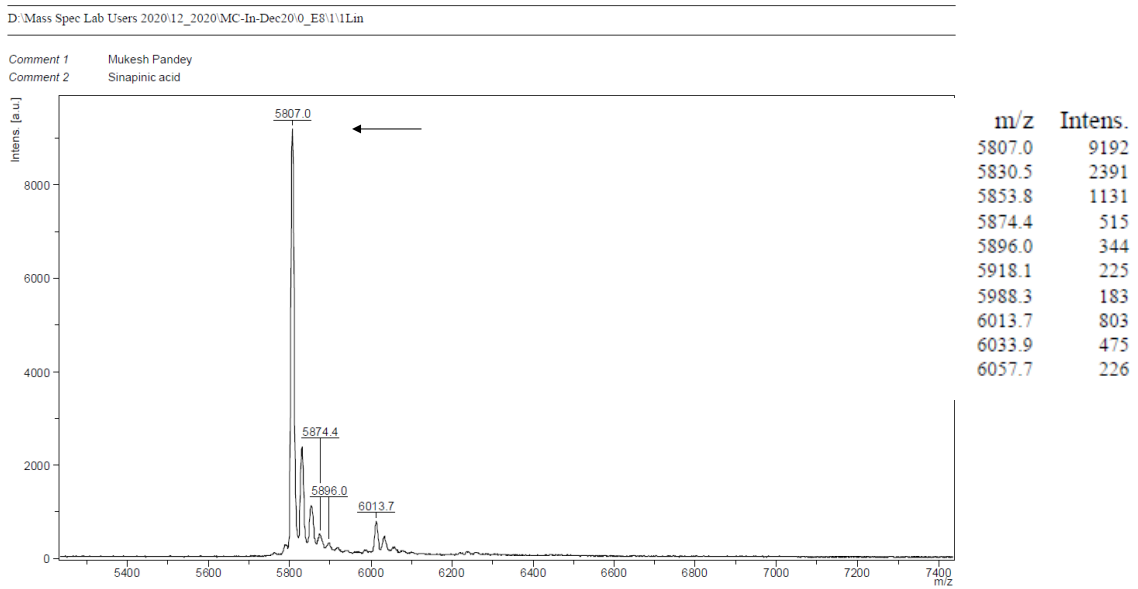

**Figure S5:** MALDI-TOF spectrum of NOTA-insulin before reaction condition optimization and after PD-10 purification

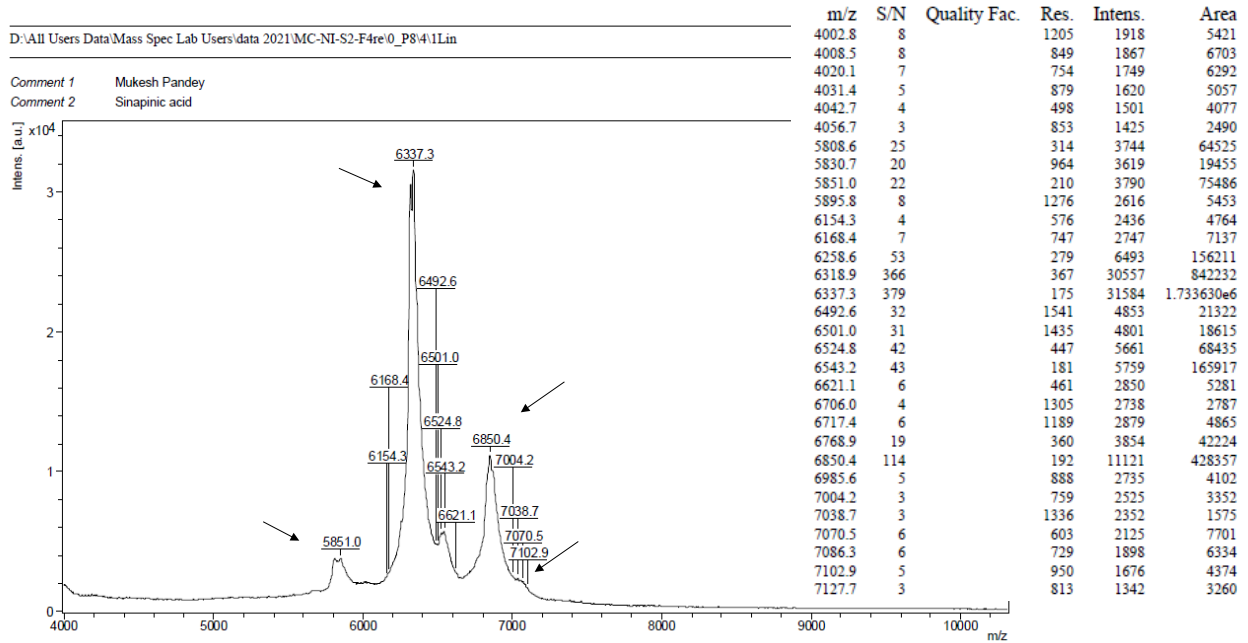

**Figure S6:** MALDI-TOF spectrum of NOTA-insulin after optimization of reaction condition and PD-10 purification

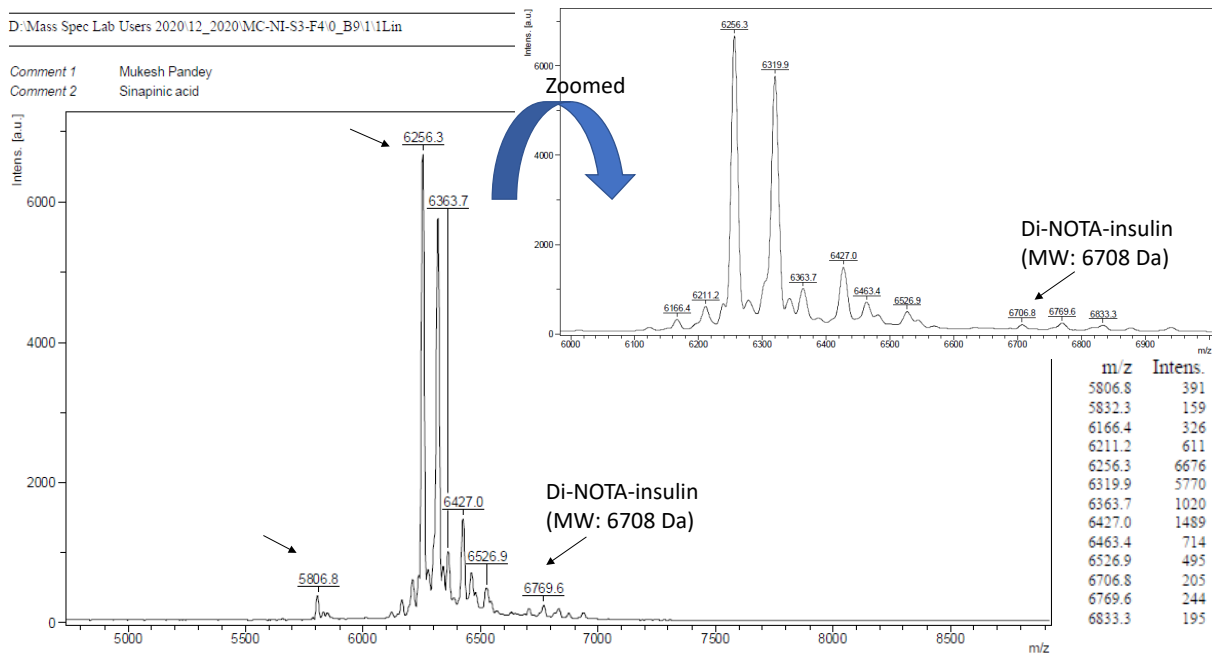

**Figure S7:** r-TLC trace of [<sup>68</sup>Ga]Ga-NOTA-insulin

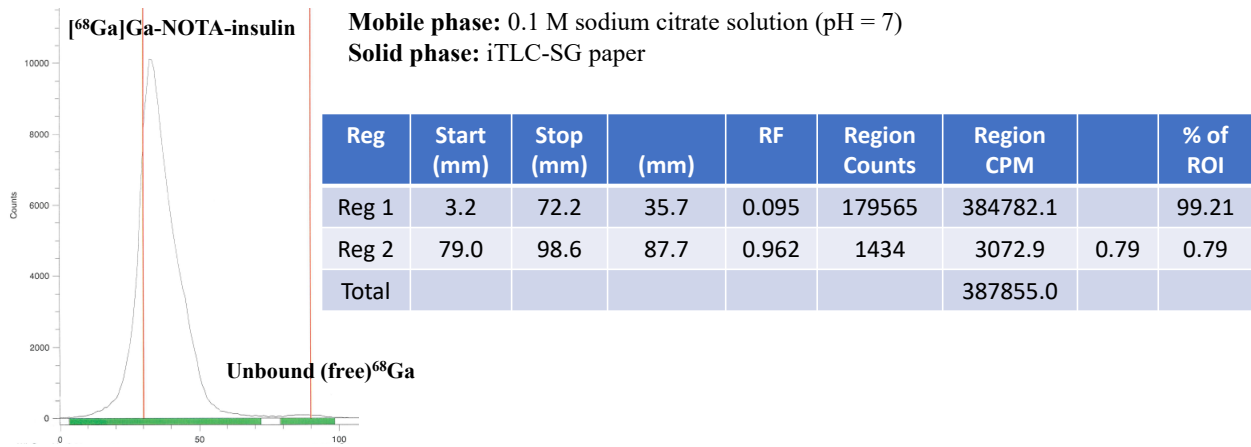

**Figure S8:** Brain (SUV) of (A) [<sup>18</sup>F]AV1451 and (B) [<sup>11</sup>C]PIB and Heart (SUV) (C) [<sup>18</sup>F]AV1451 and (D) [<sup>11</sup>C]PIB in AD (n=4 for each tracer) and normal (n=4 for each tracer) mice at 5, 10, 15 and 20 min post intravenous (i.v.) administration. The uptake (SUV) data for figure 10 was extracted from micro-PET/CT images by drawing region of interest (ROI) at different timepoints.

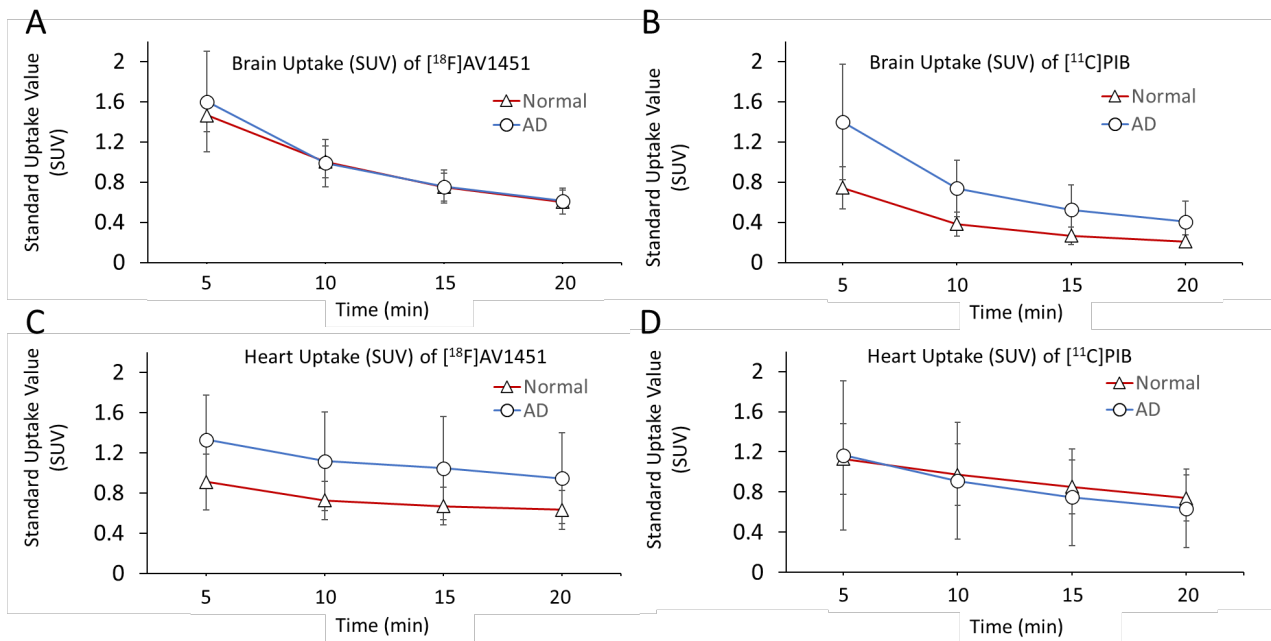

**Figure S9:** Uptake (SUV) and biodistribution of (A) [ $^{18}\text{F}$ ]AV1451 and (B) [ $^{11}\text{C}$ ]PIB in different brain regions of AD (n=4 for each tracer) and normal (n=4 for each tracer) at 30 min post intravenous (i.v.) administration.

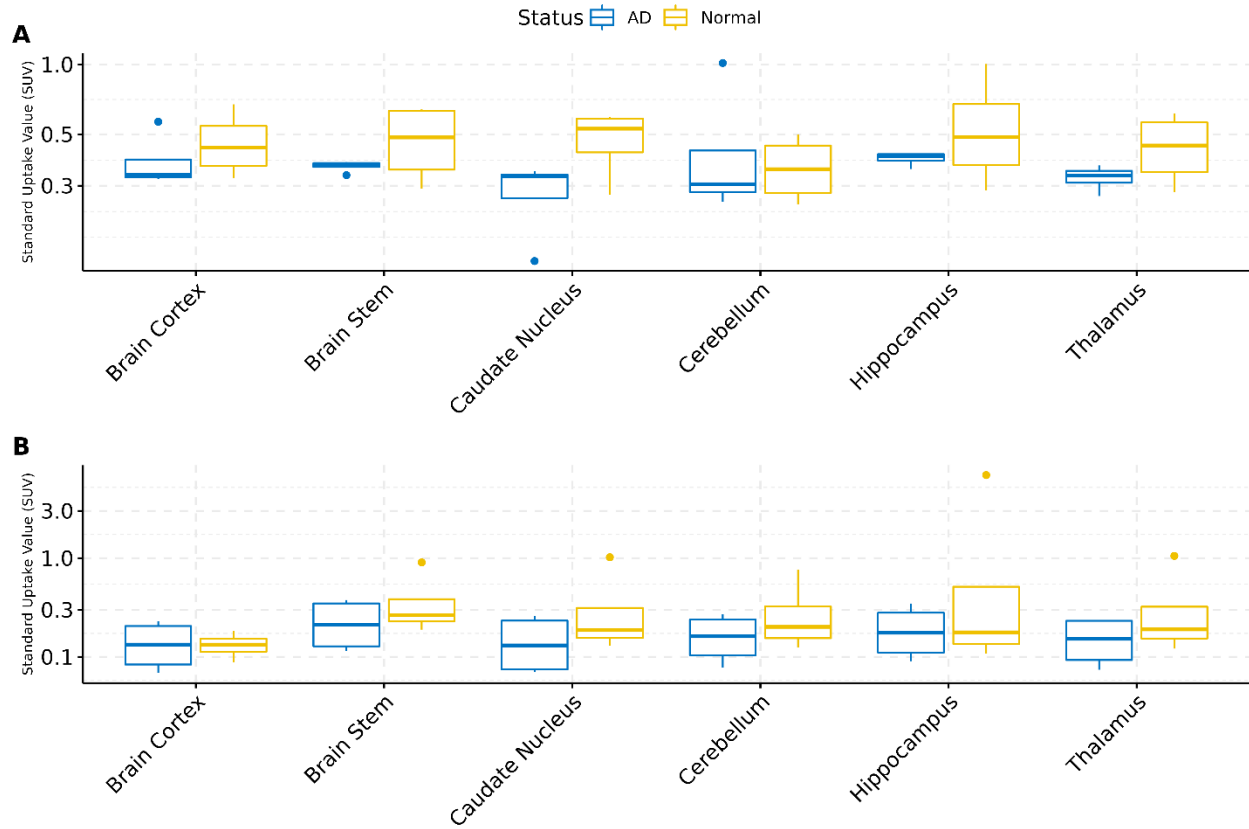

**Figure S10:** Uptake (SUV) and biodistribution of (A) [ $^{18}\text{F}$ ]AV1451 and (B) [ $^{11}\text{C}$ ]PIB in AD (n=4 for each tracer) and normal (n=4 for each tracer) at 30 min post intravenous (i.v.) administration.

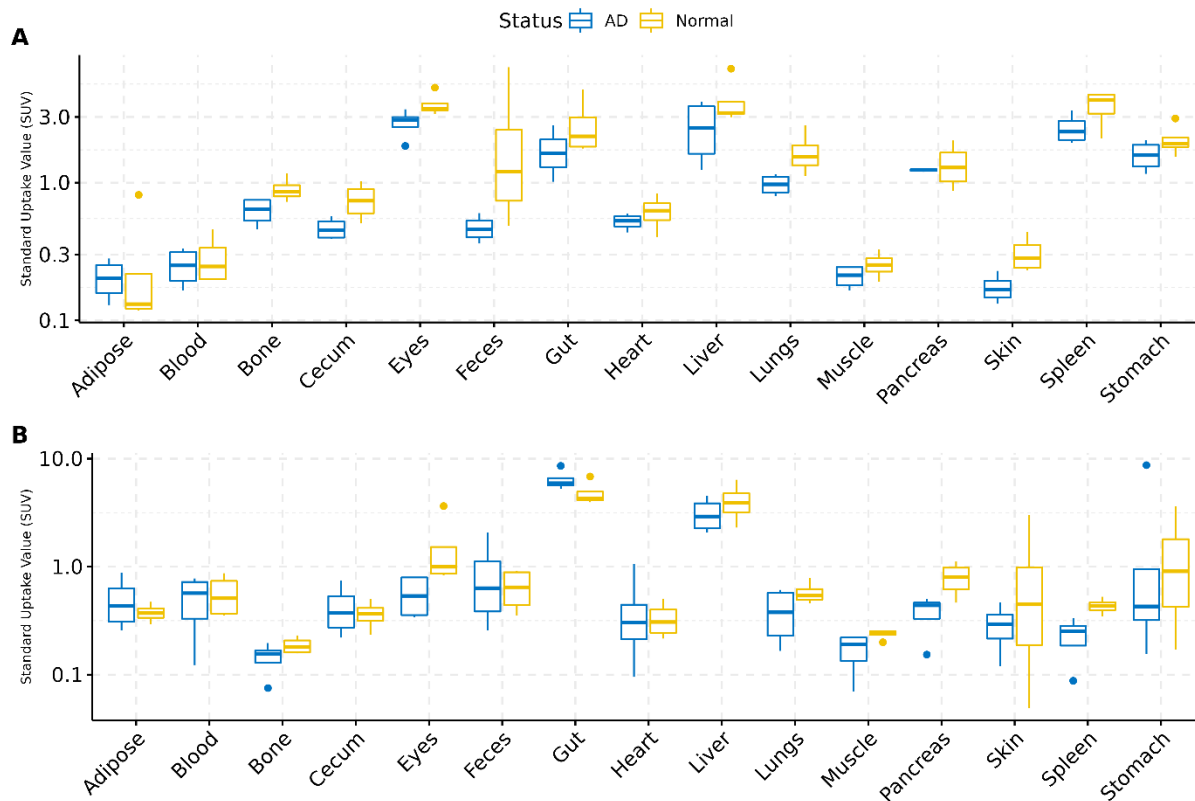



**Figure S11:** Representative micro-PET/CT images of (A) [ $^{18}\text{F}$ ]AV1451 and (B) [ $^{11}\text{C}$ ]PIB in normal and AD mice at different time points post intravenous (i.v.) administration.

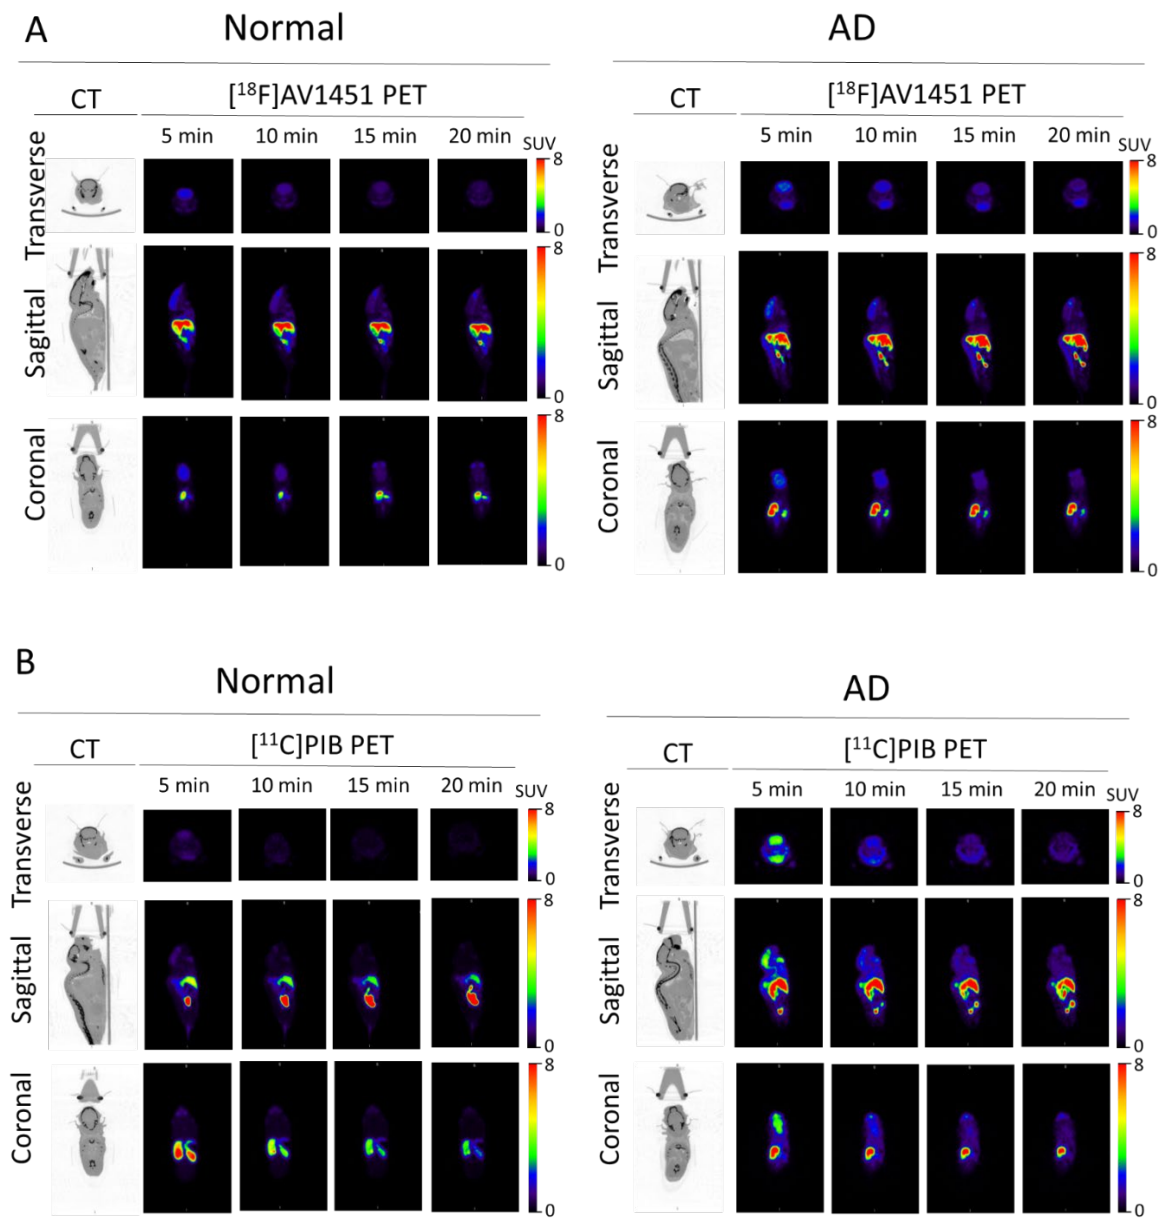

**Table S1:** Details of injected NOTA-insulin (nonradioactive mass) as [<sup>68</sup>Ga]Ga-NOTA-insulin, specific activity( $A_s$ ) at time of injection and molar activity( $A_m$ ) at end of the synthesis

| <b>AD</b>     | Insulin injected /Body Wt ( $\mu\text{g/g}$ ) | Specific activity ( $A_s$ ) at Time of Injection ( $\text{MBq}/\mu\text{g}$ ) | Molar activity ( $A_m$ ) at End of synthesis ( $\text{GBq}/\mu\text{mol}$ ) |
|---------------|-----------------------------------------------|-------------------------------------------------------------------------------|-----------------------------------------------------------------------------|
| AD Mouse 1    | 0.341                                         | 0.17                                                                          | 0.92                                                                        |
| AD Mouse 2    | 0.318                                         | 0.13                                                                          |                                                                             |
| AD Mouse 3    | 0.176                                         | 0.36                                                                          | 1.17                                                                        |
| AD Mouse 4    | 0.277                                         | 0.20                                                                          |                                                                             |
| AD Mouse 5    | 0.190                                         | 0.27                                                                          | 0.97                                                                        |
| AD Mouse 6    | 0.297                                         | 0.17                                                                          |                                                                             |
| AD Mouse 7    | 0.170                                         | 0.34                                                                          | 1.21                                                                        |
| AD Mouse 8    | 0.266                                         | 0.25                                                                          |                                                                             |
| AD Mouse 9    | 0.163                                         | 0.40                                                                          | 1.35                                                                        |
| AD Mouse 10   | 0.297                                         | 0.29                                                                          |                                                                             |
| <b>Normal</b> |                                               |                                                                               |                                                                             |
| Mouse 1       | 0.092                                         | 0.26                                                                          | 0.70                                                                        |
| Mouse 2       | 0.197                                         | 0.22                                                                          |                                                                             |
| Mouse 3       | 0.085                                         | 0.48                                                                          | 1.11                                                                        |
| Mouse 4       | 0.211                                         | 0.32                                                                          |                                                                             |
| Mouse 5       | 0.103                                         | 0.25                                                                          | 0.71                                                                        |
| Mouse 6       | 0.210                                         | 0.18                                                                          |                                                                             |
| Mouse 7       | 0.116                                         | 0.36                                                                          | 0.96                                                                        |
| Mouse 8       | 0.201                                         | 0.26                                                                          |                                                                             |
| Mouse 9       | 0.123                                         | 0.61                                                                          | 1.45                                                                        |
| Mouse 10      | 0.256                                         | 0.43                                                                          |                                                                             |
| Mouse 11      | 0.098                                         | 0.61                                                                          | 1.40                                                                        |
| Mouse 12      | 0.226                                         | 0.44                                                                          |                                                                             |
|               |                                               | Average                                                                       | 1.1±0.26                                                                    |

**Table S2:** Uptake (SUV) of [<sup>18</sup>F]AV1451 in brain of AD (APP/PS1) and normal (B6SJL) mice post intravenous administration measured via micro PET/CT image analysis and drawing region of interest (ROI) on whole mice brain and whole heart at different timepoints.

| <b>Time points (min)</b> | <b>AD Brain (Avg. SUV±SD, n=4)</b> | <b>Normal Brain (Avg. SUV±SD, n=4)</b> | <b>P value</b> | <b>AD Heart (Avg. SUV±SD, n=4)</b> | <b>Normal Heart (Avg. SUV±SD, n=4)</b> | <b>P value</b> |
|--------------------------|------------------------------------|----------------------------------------|----------------|------------------------------------|----------------------------------------|----------------|
| 5                        | 1.601 ± 0.499                      | 1.465 ± 0.164                          | 0.311          | 1.329 ± 0.448                      | 0.912 ± 0.278                          | 0.082          |
| 10                       | 0.989 ± 0.236                      | 1.003 ± 0.158                          | 0.464          | 1.118 ± 0.492                      | 0.728 ± 0.190                          | 0.095          |
| 15                       | 0.754 ± 0.164                      | 0.749 ± 0.138                          | 0.483          | 1.047 ± 0.514                      | 0.670 ± 0.187                          | 0.108          |
| 20                       | 0.611 ± 0.129                      | 0.602 ± 0.118                          | 0.461          | 0.948 ± 0.450                      | 0.632 ± 0.193                          | 0.123          |

**Table S3:** Uptake (SUV) of [<sup>18</sup>F]AV1451 in different brain regions of Normal (B6SJL) and AD (APP/PS1) mice models at 30 min post intravenous administration measured via organ/tissue harvesting.

| <b>Mouse brain regions</b> | <b>Alzheimer's disease mice<br/>(Avg. SUV±SD, n=4)</b> | <b>Normal mice<br/>(Avg. SUV±SD,<br/>n=4)</b> | <b>P value</b> |
|----------------------------|--------------------------------------------------------|-----------------------------------------------|----------------|
| Caudate Nucleus            | 0.287 ± 0.097                                          | 0.483 ± 0.148                                 | 0.37           |
| Cortex                     | 0.390 ± 0.118                                          | 0.471 ± 0.155                                 | 0.58           |
| Hippocampus                | 0.394 ± 0.027                                          | 0.572 ± 0.316                                 | 0.52           |
| Thalamus                   | 0.326 ± 0.041                                          | 0.453 ± 0.155                                 | 0.40           |
| Brain stem                 | 0.365 ± 0.021                                          | 0.484 ± 0.177                                 | 0.45           |
| Cerebellum                 | 0.471 ± 0.365                                          | 0.367 ± 0.117                                 | 0.76           |

**Table S4:** Uptake (SUV) of [<sup>18</sup>F]AV1451 in Normal (B6SJL) and AD (APP/PS1)mice models at 30 min post intravenous administration measured via organ/tissue harvesting.

| <b>Organ/Tissue</b> | <b>Alzheimer's disease mice<br/>(Avg. SUV±SD, n=4)</b> | <b>Normal mice<br/>(Avg. SUV±SD, n=4)</b> | <b>P value</b> |
|---------------------|--------------------------------------------------------|-------------------------------------------|----------------|
| Blood               | 0.252 ± 0.080                                          | 0.289 ± 0.122                             | 0.76           |
| Heart               | 0.522 ± 0.071                                          | 0.625 ± 0.181                             | 0.52           |
| Lungs               | 0.976 ± 0.171                                          | 1.707 ± 0.647                             | 0.37           |
| Liver               | 2.593 ± 1.284                                          | 4.038 ± 1.796                             | 0.40           |
| Spleen              | 2.503 ± 0.635                                          | 3.616 ± 1.067                             | 0.40           |
| Pancreas            | 1.234 ± 0.033                                          | 1.379 ± 0.515                             | 0.76           |
| Bone                | 0.628 ± 0.146                                          | 0.903 ± 0.190                             | 0.37           |
| Gut                 | 1.733 ± 0.685                                          | 2.727 ± 1.385                             | 0.40           |
| Feces               | 0.471 ± 0.105                                          | 2.486 ± 2.986                             | 0.40           |
| Adipose             | 0.206 ± 0.069                                          | 0.299 ± 0.344                             | 0.76           |
| Stomach             | 1.597 ± 0.404                                          | 2.074 ± 0.594                             | 0.40           |
| Skin                | 0.174 ± 0.042                                          | 0.311 ± 0.095                             | 0.37           |
| Muscle              | 0.209 ± 0.040                                          | 0.256 ± 0.057                             | 0.40           |
| Cecum               | 0.469 ± 0.087                                          | 0.756 ± 0.231                             | 0.37           |
| Eyes                | 2.738 ± 0.652                                          | 3.729 ± 0.791                             | 0.40           |
| Bladder             | 1.799 ± 1.093                                          | 2.529 ± 2.640                             | 0.80           |
| Kidneys             | 2.618 ± 1.931                                          | 4.753 ± 1.427                             | 0.40           |
| Urine               | 7.971 ± 8.091                                          | 6.788 ± 2.134                             | 0.79           |

**Table S5:** Uptake (SUV) of [<sup>11</sup>C]PIB in brain of AD (APP/PS1) and normal (B6SJL) mice post intravenous administration measured via micro PET/CT image analysis and drawing region of interest (ROI) on whole mice brain and whole heart at different timepoints.

| <b>Time points (min)</b> | <b>AD Brain (Avg. SUV±SD, n=4)</b> | <b>Normal Brain (Avg. SUV±SD, n=4)</b> | <b>P value</b> | <b>AD Heart (Avg. SUV±SD, n=4)</b> | <b>Normal Heart (Avg. SUV±SD, n=4)</b> | <b>P value</b> |
|--------------------------|------------------------------------|----------------------------------------|----------------|------------------------------------|----------------------------------------|----------------|
| 5                        | 0.866 ± 0.386                      | 0.743 ± 0.211                          | 0.299          | 1.167 ± 0.743                      | 1.131 ± 0.351                          | 0.215          |
| 10                       | 0.436 ± 0.172                      | 0.381 ± 0.118                          | 0.307          | 0.911 ± 0.582                      | 0.972 ± 0.306                          | 0.328          |
| 15                       | 0.278 ± 0.099                      | 0.266 ± 0.088                          | 0.434          | 0.749 ± 0.482                      | 0.854 ± 0.267                          | 0.414          |
| 20                       | 0.203 ± 0.067                      | 0.210 ± 0.065                          | 0.450          | 0.637 ± 0.388                      | 0.740 ± 0.228                          | 0.434          |

**Table S6:** Uptake (SUV) of [<sup>11</sup>C]PIB in different brain regions of Normal (B6SJL) and AD (APP/PS1) mice models at 30 min post intravenous administration measured via organ/tissue harvesting. P values have been adjusted for multiple testing.

| <b>Mouse brain regions</b> | <b>Alzheimer's disease mice<br/>(Avg. SUV±SD, n=4)</b> | <b>Normal mice<br/>(Avg. SUV±SD,<br/>n=4)</b> | <b>P value</b> |
|----------------------------|--------------------------------------------------------|-----------------------------------------------|----------------|
| Cortex                     | 0.147 ± 0.08                                           | 0.132 ± 0.049                                 | 0.90           |
| Caudate Nucleus            | 0.158 ± 0.09                                           | 0.169 ± 0.041                                 | 0.64           |
| Hippocampus                | 0.204 ± 0.12                                           | 0.157 ± 0.055                                 | 0.64           |
| Thalamus                   | 0.160 ± 0.08                                           | 0.168 ± 0.048                                 | 0.64           |
| Brain stem                 | 0.241 ± 0.13                                           | 0.241 ± 0.050                                 | 0.64           |
| Cerebellum                 | 0.173 ± 0.09                                           | 0.178 ± 0.061                                 | 0.64           |

**Table S7:** Uptake (SUV) of [<sup>11</sup>C]PIB in Normal (B6SJL) and AD (APP/PS1) mice models at 30 min post intravenous administration measured via organ/tissue harvesting. P values have been adjusted for multiple testing.

| <b>Organ/Tissue</b> | <b>Alzheimer's disease mice<br/>(Avg. SUV±SD, n=4)</b> | <b>Normal mice<br/>(Avg. SUV±SD, n=4)</b> | <b>P value</b> |
|---------------------|--------------------------------------------------------|-------------------------------------------|----------------|
| Blood               | 0.516 ± 0.296                                          | 0.532 ± 0.294                             | 0.86           |
| Heart               | 0.441 ± 0.424                                          | 0.325 ± 0.158                             | 0.86           |
| Lungs               | 0.398 ± 0.220                                          | 0.607 ± 0.163                             | 0.63           |
| Liver               | 3.148 ± 1.159                                          | 4.076 ± 2.094                             | 0.64           |
| Spleen              | 0.232 ± 0.104                                          | 0.464 ± 0.057                             | 0.55           |
| Pancreas            | 0.384 ± 0.157                                          | 0.911 ± 0.217                             | 0.55           |
| Bone                | 0.146 ± 0.051                                          | 0.184 ± 0.042                             | 0.63           |
| Gut                 | 6.440 ± 1.464                                          | 4.989 ± 1.604                             | 0.63           |
| Feces               | 0.922 ± 0.819                                          | 0.716 ± 0.316                             | 0.86           |
| Adipose             | 0.507 ± 0.279                                          | 0.406 ± 0.061                             | 0.64           |
| Stomach             | 2.433 ± 4.190                                          | 1.873 ± 1.570                             | 0.98           |
| Skin                | 0.295 ± 0.144                                          | 0.341 ± 0.317                             | 0.64           |
| Muscle              | 0.171 ± 0.072                                          | 0.232 ± 0.028                             | 0.63           |
| Cecum               | 0.435 ± 0.236                                          | 0.413 ± 0.082                             | 0.86           |
| Eyes                | 0.574 ± 0.258                                          | 1.886 ± 1.530                             | 0.63           |
| Bladder             | 11.353 ± 7.539                                         | 5.848 ± 4.365                             | 0.63           |
| Kidneys             | 6.853 ± 5.772                                          | 3.881 ± 0.803                             | 0.98           |



|       |                     |                     |      |
|-------|---------------------|---------------------|------|
| Urine | $64.293 \pm 32.503$ | $30.571 \pm 27.148$ | 0.63 |
|-------|---------------------|---------------------|------|
